# Supplementary material
Source: MDPI journal article supplement (https://www.mdpi.com/2077-0472/12/3/398)
Supplement: s1 [file s1]

**Table S1.** Retention times, electrospray ionisation modes (either positive ES+ or negative ES-), molecular weights (Mw), multiple reaction monitoring values (MRM), cone voltages (Cone), collision energies (Coll) and limits of quantification (LOQ) for mycotoxins determined with UHPLC-MS/MS. Bolded MRMs were used for identification, other as qualifiers. Caffeine was used as an internal standard (IS) for quantification, extraction was controlled (EC) by nandrolone. A huge interference signal was detected from grass silage matrix for all MRMs of patulin. Moniliformin, nivalenol and citrinin were not detectable with this method.

| Mycotoxin               | Retention time (min) | Ionisation mode | Mw  | MRM                      | Cone (V) | Coll. (eV) | LOQ (µg/kg air-dry) |
|-------------------------|----------------------|-----------------|-----|--------------------------|----------|------------|---------------------|
| Caffeine (IS)           | 4.4                  | ES+             | 194 | <b>195.0 -&gt; 138.0</b> | 10       | 18         |                     |
|                         |                      |                 |     | 195.0 -> 110.0           | 10       | 22         |                     |
| Nandrolone (EC)         | 7.4                  | ES+             | 274 | <b>275.3 -&gt; 239.2</b> | 30       | 16         |                     |
|                         |                      |                 |     | 275.3 -> 145.1           | 30       | 20         |                     |
|                         |                      |                 |     | 275.3 -> 109.1           | 30       | 24         |                     |
| Moniliformin            | 0.8                  | ES-             | 98  | <b>96.9 -&gt; 40.9</b>   | 27       | 10         | -                   |
| Patulin                 | 3.5                  | ES+             | 154 | <b>155.0 -&gt; 52.9</b>  | 15       | 20         | 250                 |
|                         |                      |                 |     | 155.0 -> 80.9            | 15       | 20         |                     |
| Nivalenol               | 3.5                  | ES+             | 312 | <b>313.7 -&gt; 175.1</b> | 14       | 15         | -                   |
|                         |                      |                 |     | 313.7 -> 295.1           | 14       | 7          |                     |
|                         |                      | ES-             |     | <b>311.2 -&gt; 281.2</b> | 26       | 12         | -                   |
| Deoxynivalenol          | 4.0                  | ES+             | 296 | <b>297.3 -&gt; 249.0</b> | 18       | 12         | 130                 |
|                         |                      |                 |     | 297.3 -> 231.0           | 18       | 14         |                     |
|                         |                      |                 |     | 297.3 -> 203.0           | 18       | 10         |                     |
| Fusarenon X             | 4.7                  | ES+             | 354 | <b>355.3 -&gt; 229.1</b> | 14       | 16         | 250                 |
|                         |                      |                 |     | 355.3 -> 247.2           | 14       | 13         |                     |
|                         |                      |                 |     | 355.3 -> 175.1           | 14       | 20         |                     |
| Penicillic acid         | 4.9                  | ES+             | 170 | <b>171.1 -&gt; 125.0</b> | 17       | 12         | 50                  |
|                         |                      |                 |     | 171.1 -> 153.0           | 17       | 7          |                     |
| 15-Acetyldeoxynivalenol | 5.4                  | ES+             | 338 | <b>339.2 -&gt; 137.1</b> | 20       | 12         | 250                 |
|                         |                      |                 |     | 339.2 -> 261.2           | 20       | 12         |                     |
| 3-Acetyldeoxynivalenol  | 5.5                  | ES+             | 338 | <b>339.3 -&gt; 231.2</b> | 18       | 10         | 250                 |
|                         |                      |                 |     | 339.3 -> 203.2           | 18       | 16         |                     |
|                         |                      |                 |     | 339.3 -> 213.2           | 14       | 10         |                     |
| Aflatoxin G2            | 6.0                  | ES+             | 330 | <b>331.3 -&gt; 245.1</b> | 44       | 28         | 30                  |
|                         |                      |                 |     | 331.3 -> 189.1           | 44       | 34         |                     |
| Aflatoxin G1            | 6.3                  | ES+             | 328 | <b>329.0 -&gt; 243.0</b> | 40       | 28         | 30                  |
|                         |                      |                 |     | 329.0 -> 199.8           | 40       | 40         |                     |
| Aflatoxin B2            | 6.3                  | ES+             | 314 | <b>315.2 -&gt; 287.1</b> | 40       | 26         | 30                  |
|                         |                      |                 |     | 315.2 -> 259.1           | 40       | 30         |                     |
| Fumonisin B1            | 6.4                  | ES+             | 721 | <b>722.4 -&gt; 334.3</b> | 50       | 40         | 13                  |
|                         |                      |                 |     | 722.4 -> 352.3           | 50       | 40         |                     |
| Aflatoxin B1            | 6.5                  | ES+             | 312 | <b>313.3 -&gt; 241.2</b> | 46       | 38         | 30                  |
|                         |                      |                 |     | 313.3 -> 285.0           | 46       | 22         |                     |
| Diacetoxyscirpenol      | 6.5                  | ES+             | 366 | <b>367.3 -&gt; 247.2</b> | 20       | 10         | 250                 |
|                         |                      |                 |     | 367.3 -> 307.3           | 20       | 8          |                     |
|                         |                      |                 |     | 367.3 -> 105.1           | 20       | 26         |                     |

|                              |      |     |     |                          |    |    |     |
|------------------------------|------|-----|-----|--------------------------|----|----|-----|
| Roquefortine C               | 6.5  | ES+ | 389 | <b>390.2 -&gt; 193.0</b> | 35 | 27 | 10  |
|                              |      |     |     | 390.2 -> 322.2           | 35 | 19 |     |
| Alternariol                  | 6.6  | ES+ | 258 | <b>259.2 -&gt; 185.1</b> | 48 | 32 | 50  |
|                              |      |     |     | 259.2 -> 128.0           | 48 | 44 |     |
| Fumonisin B3                 | 6.8  | ES+ | 705 | <b>706.3 -&gt; 336.3</b> | 50 | 40 | 13  |
|                              |      |     |     | 706.3 -> 318.3           | 50 | 40 |     |
| HT-2-toxin                   | 6.9  | ES+ | 424 | <b>425.4 -&gt; 263.2</b> | 14 | 12 | 250 |
|                              |      |     |     | 425.4 -> 245.2           | 14 | 12 |     |
|                              |      |     |     | 425.2 -> 215.2           | 14 | 12 |     |
|                              |      |     |     | 425.2 -> 105.0           | 14 | 40 |     |
| Citrinin                     | 6.9  | ES+ | 250 | <b>251.2 -&gt; 205.2</b> | 16 | 24 | -   |
|                              |      |     |     | 251.2 -> 191.0           | 16 | 26 |     |
|                              |      |     |     | 251.2 -> 147.1           | 16 | 26 |     |
|                              |      |     |     | 251.2 -> 91.0            | 16 | 40 |     |
| Fumonisin B2                 | 7.1  | ES+ | 705 | <b>706.3 -&gt; 336.3</b> | 50 | 40 | 13  |
|                              |      |     |     | 706.3 -> 318.3           | 50 | 40 |     |
| Mycophenolic acid            | 7.3  | ES+ | 320 | <b>321.2 -&gt; 207.1</b> | 14 | 22 | 30  |
|                              |      |     |     | 321.2 -> 159.0           | 14 | 36 |     |
| Alternariol monomethyl ether | 7.9  | ES+ |     | <b>273.1 -&gt; 184.2</b> | 40 | 36 | 50  |
|                              |      |     |     | 273.1 -> 128.0           | 40 | 44 |     |
| T-2-toxin                    | 7.9  | ES+ | 466 | <b>467.4 -&gt; 305.2</b> | 22 | 8  | 250 |
|                              |      |     |     | 467.4 -> 245.0           | 22 | 6  |     |
|                              |      |     |     | 467.4 -> 365.3           | 22 | 6  |     |
| Zearalenone                  | 8.1  | ES- | 318 | <b>317.2 -&gt; 175.0</b> | 42 | 26 | 30  |
|                              |      |     |     | 317.2 -> 131.0           | 42 | 30 |     |
| Ochratoxin A                 | 8.3  | ES+ | 403 | <b>404.2 -&gt; 239.1</b> | 25 | 32 | 10  |
|                              |      |     |     | 404.2 -> 358.2           | 25 | 20 |     |
| Sterigmatocystin             | 8.3  | ES+ | 324 | <b>325.2 -&gt; 310.1</b> | 8  | 20 | 30  |
|                              |      |     |     | 325.2 -> 253.2           | 8  | 46 |     |
|                              |      |     |     | 325.2 -> 141.1           | 8  | 54 |     |
|                              |      |     |     | 325.2 -> 115.1           | 8  | 60 |     |
| Cyclopiazonic acid           | 8.7  | ES+ | 336 | <b>337.1 -&gt; 196.0</b> | 22 | 26 | 25  |
|                              |      |     |     | 337.1 -> 182.0           | 22 | 20 |     |
| Beauvericin                  | 11.1 | ES+ | 783 | <b>784.6 -&gt; 262.2</b> | 34 | 28 | 5   |
|                              |      |     |     | 784.6 -> 244.2           | 34 | 28 |     |
|                              |      |     |     | 784.6 -> 134.1           | 34 | 66 |     |
|                              |      |     |     | 784.6 -> 234.2           | 34 | 38 |     |
| Enniatin B                   | 11.1 | ES+ | 639 | <b>640.5 -&gt; 85.9</b>  | 64 | 30 | 10  |
|                              |      |     |     | 640.5 -> 195.9           | 64 | 36 |     |
| Enniatin B1                  | 11.5 | ES+ | 653 | <b>654.3 -&gt; 195.9</b> | 46 | 24 | 10  |
|                              |      |     |     | 654.3 -> 99.9            | 46 | 54 |     |
| Enniatin A1                  | 12.0 | ES+ | 667 | <b>668.3 -&gt; 99.9</b>  | 48 | 60 | 10  |
|                              |      |     |     | 668.3 -> 210.0           | 48 | 26 |     |
| Enniatin A                   | 12.3 | ES+ | 681 | <b>682.6 -&gt; 210.3</b> | 70 | 34 | 10  |
|                              |      |     |     | 682.6 -> 99.9            | 70 | 30 |     |
